# Supplementary material for: Revealing the roles of solvation in D-mannitol's polymorphic nucleation
Source: Royal Society of Chemistry journal article supplement (doi:10.1039/c8ce01222a), 2018-01-01
Supplement: c8ce01222a1.pdf [file c8ce01222a1.pdf]

# Revealing the Roles of Solvation in D-mannitol's Polymorphic Nucleation

Shiyuan Liu<sup>†</sup>, Shijie Xu<sup>†</sup>, Weiwei Tang<sup>†</sup>, Bo Yu<sup>†</sup>, Baohong Hou<sup>†</sup> and Junbo Gong<sup>\*, †, ‡, §</sup>

<sup>†</sup> State Key Laboratory of Chemical Engineering, School of Chemical Engineering and Technology, Tianjin University, Tianjin 300072, P. R. China

<sup>‡</sup> Collaborative Innovation Center of Chemistry Science and Engineering, Tianjin 300072, P. R. China

<sup>§</sup> Key Laboratory Modern Drug Delivery and High Efficiency in Tianjin, P. R. China

## Contents of Supporting Information

|                        |   |
|------------------------|---|
| <b>Table S1</b> .....  | 2 |
| <b>Table S2</b> .....  | 2 |
| <b>Table S3</b> .....  | 4 |
| <b>Figure S1</b> ..... | 4 |
| <b>Figure S2</b> ..... | 5 |
| <b>Figure S3</b> ..... | 5 |
| <b>Figure S4</b> ..... | 6 |
| <b>Figure S5</b> ..... | 6 |
| <b>Figure S6</b> ..... | 7 |
| <b>Figure S7</b> ..... | 7 |

**Table S1**TABLE S1. Optimized and experimental lattice parameters of  $\beta$ -D-man by different force fields.

| Lattice parameters | $a/\text{\AA}$ | $b/\text{\AA}$ | $c/\text{\AA}$ |
|--------------------|----------------|----------------|----------------|
| Experimental       | 5.5381         | 8.5800         | 16.7950        |
| COMPASS            | 5.4952         | 8.3750         | 16.7400        |
| Dreiding           | 5.8702         | 8.8912         | 17.0742        |
| Universal          | 6.3907         | 9.3883         | 16.9352        |
| cvff               | 5.4265         | 8.5740         | 16.8486        |
| pcff               | 5.7457         | 8.5957         | 16.9435        |

**Table S2**Table S2. Mole fraction solubility ( $x^{exp}$ ) of D-man in the water + methanol solvent mixtures at temperature  $T$  and pressure  $P = 0.1$  MPa. <sup>a</sup>

| $x^0$          | $10^3 x_A^{exp}$ | $10^3 x_A^{cal}$ |
|----------------|------------------|------------------|
| $T = 288.15$ K |                  |                  |
| 0              | 0.119            | 0.118            |
| 0.1            | 0.172            | 0.167            |
| 0.2            | 0.282            | 0.291            |
| 0.5            | 1.305            | 1.322            |
| 0.8            | 5.736            | 5.738            |
| 0.9            | 8.888            | 8.924            |
| 1.0            | 15.051           | 15.084           |
| $T = 293.15$ K |                  |                  |
| 0              | 0.163            | 0.166            |
| 0.1            | 0.230            | 0.230            |
| 0.2            | 0.374            | 0.375            |
| 0.5            | 1.669            | 1.683            |
| 0.8            | 7.047            | 7.007            |
| 0.9            | 10.754           | 10.712           |
| 1.0            | 17.506           | 17.454           |

---

|     |                        |        |
|-----|------------------------|--------|
|     | $T = 298.15 \text{ K}$ |        |
| 0   | 0.225                  | 0.221  |
| 0.1 | 0.298                  | 0.309  |
| 0.2 | 0.501                  | 0.484  |
| 0.5 | 2.197                  | 2.132  |
| 0.8 | 8.525                  | 8.522  |
| 0.9 | 12.798                 | 12.819 |
| 1.0 | 20.153                 | 20.137 |
|     | $T = 303.15 \text{ K}$ |        |
| 0   | 0.286                  | 0.284  |
| 0.1 | 0.402                  | 0.404  |
| 0.2 | 0.630                  | 0.627  |
| 0.5 | 2.671                  | 2.689  |
| 0.8 | 10.212                 | 10.323 |
| 0.9 | 15.320                 | 15.295 |
| 1.0 | 23.113                 | 23.166 |
|     | $T = 308.15 \text{ K}$ |        |
| 0   | 0.344                  | 0.351  |
| 0.1 | 0.530                  | 0.518  |
| 0.2 | 0.807                  | 0.814  |
| 0.5 | 3.354                  | 3.376  |
| 0.8 | 12.499                 | 12.458 |
| 0.9 | 18.242                 | 18.195 |
| 1.0 | 26.589                 | 26.578 |
|     | $T = 313.15 \text{ K}$ |        |
| 0   | 0.422                  | 0.419  |
| 0.1 | 0.645                  | 0.650  |
| 0.2 | 1.052                  | 1.059  |
| 0.5 | 4.223                  | 4.221  |
| 0.8 | 15.044                 | 14.980 |
| 0.9 | 21.486                 | 21.586 |
| 1.0 | 30.424                 | 30.413 |
|     | $T = 318.15 \text{ K}$ |        |
| 0   | 0.483                  | 0.483  |
| 0.1 | 0.797                  | 0.798  |
| 0.2 | 1.384                  | 1.380  |
| 0.5 | 5.260                  | 5.255  |
| 0.8 | 17.914                 | 17.949 |
| 0.9 | 25.579                 | 25.538 |
| 1.0 | 34.708                 | 34.711 |

---

$x^0$  is the initial mole fraction of water in binary solvent mixture;  $x_A^{exp}$  denotes the experimentally determined solubility;  $x_A^{cal}$  denotes the calculated solubility by the modified Apelbat model.

**Table S3**

Table S3. Predicted Mole fraction solubility ( $x$ ) of D-man in the methanol + water solvent mixtures at temperature  $T = 268.15$  and  $278.15$  K and pressure  $P = 0.1$  MPa. <sup>a</sup>

| $x^0$ | $10^3 x_A^{cal}$ |                |
|-------|------------------|----------------|
|       | $T = 268.15$ K   | $T = 278.15$ K |
| 0     | 0.019            | 0.054          |
| 0.1   | 0.035            | 0.082          |
| 0.2   | 0.108            | 0.175          |
| 0.5   | 0.466            | 0.783          |
| 0.8   | 2.522            | 3.883          |
| 0.9   | 4.277            | 6.311          |
| 1.0   | 8.220            | 11.261         |

$x^0$  is the initial mole fraction of water in binary solvent mixture;  $x_A^{cal}$  denotes the calculated solubility by the modified Apelbat models.

**Figure S1**

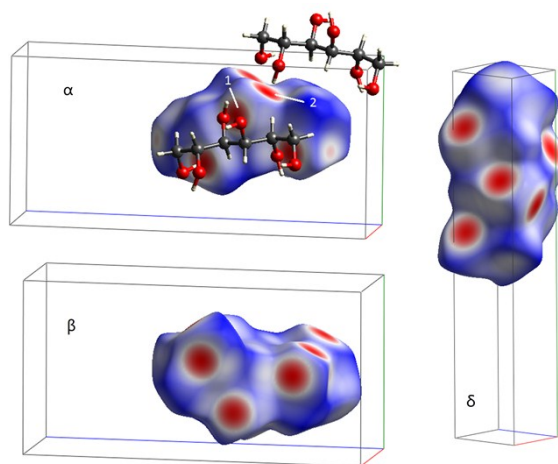

**Figure S1.** Hirshfeld surface of three anhydrous polymorphs mapped with  $d_{norm}$ . The HB donor is labelled as “1” and HB acceptor is labelled as “2”.

**Figure S2**

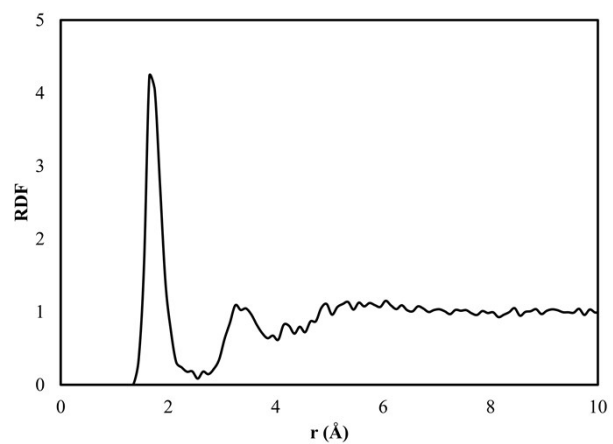

**Figure S2.** RDF between solvent molecules in aqueous solution.

**Figure S3**

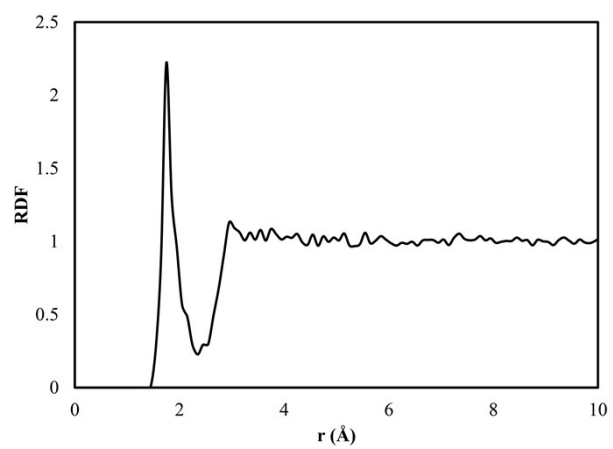

**Figure S3.** RDF between solvent molecules in methanol solution.

**Figure S4**

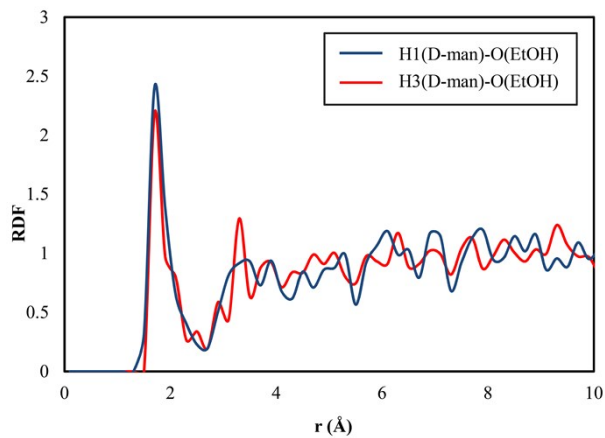

**Figure S4.** RDFs between hydrogen atoms of D-man molecules and oxygen atoms of ethanol molecules in ethanol solution.

**Figure S5**

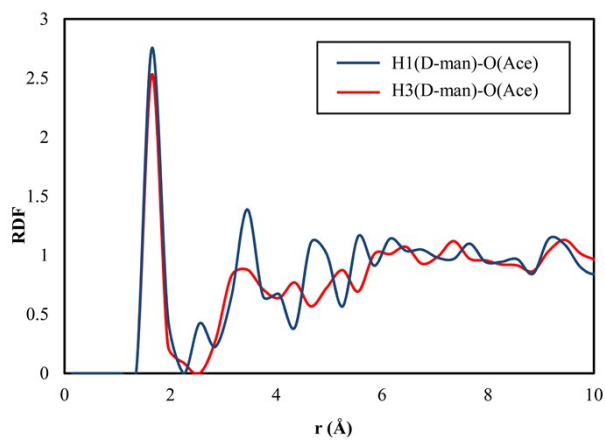

**Figure S5.** RDFs between hydrogen atoms of D-man molecules and oxygen atoms of acetone molecules in acetone solution.

**Figure S6**

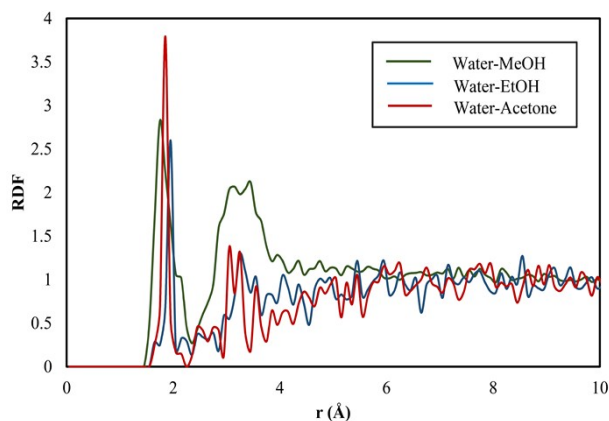

**Figure S6.** RDFs between hydrogen and oxygen atoms of water molecules in water-methanol/ethanol/acetone solutions.

**Figure S7**

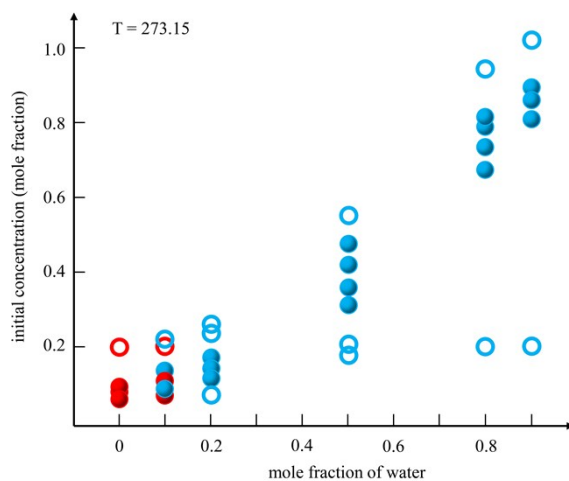

**Figure S7.** Crystallization outcomes in water-methanol solutions with different solvent ratios. The red and blue colors represent the  $\alpha$  and  $\delta$  form respectively. Balls are experimental results transformed from Figure 4, circles represent the crystallization results from the extra experiments

with extended initial concentrations. Blue and red both appear at the mole ratio of water equals to 0.1, representing a commitment polymorph behavior.
